# Supplementary material for: Development and Validation of a Forensic Multiplex System With 38 X-InDel Loci
Source: PubMed Central journal article supplement (PMC8416044; doi:10.3389/fgene.2021.670482), 2021-08-17
Supplement: Image_1.pdf [file Image_1.pdf]

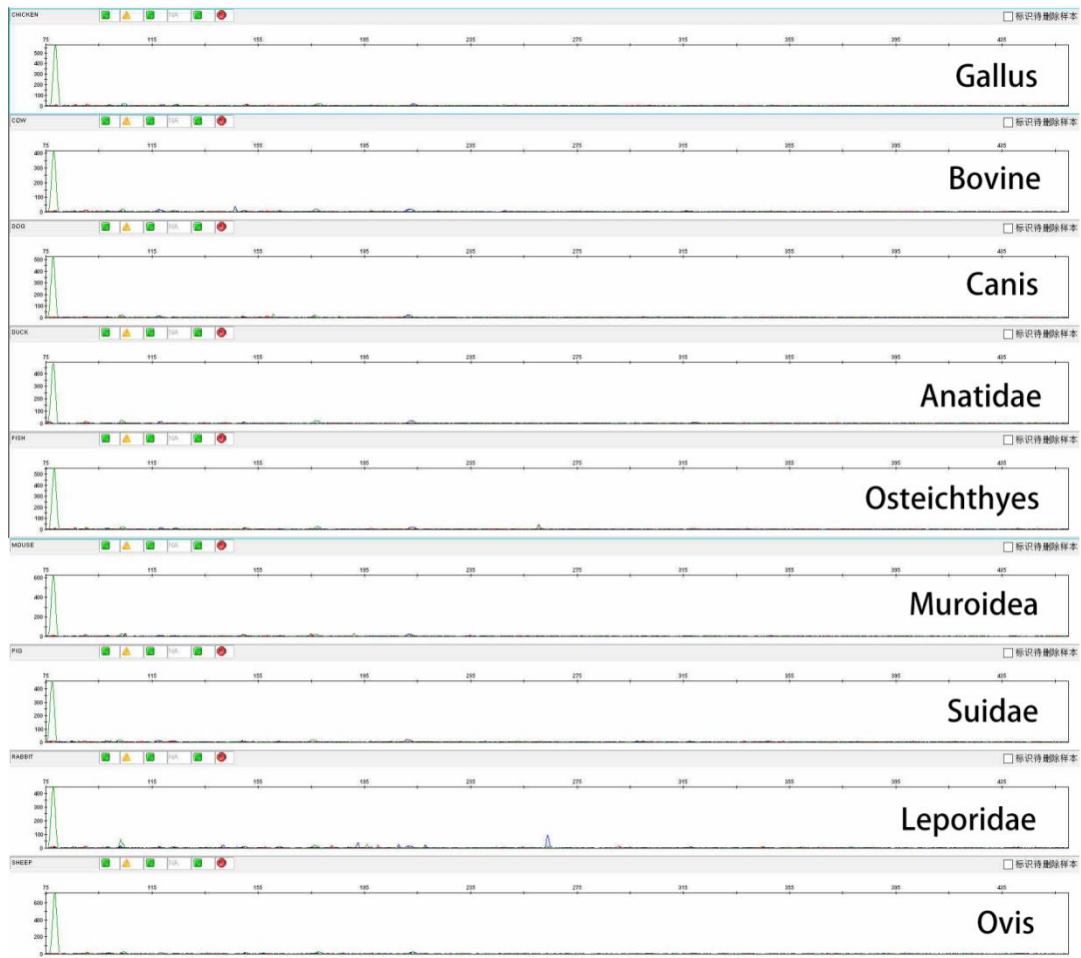

Figure S1. Electropherograms from species specificity studies of the AGCU X-InDel 38 kit.
