# Supplementary material for: Development and Validation of a Forensic Multiplex System With 38 X-InDel Loci
Source: PubMed Central journal article supplement (PMC8416044; doi:10.3389/fgene.2021.670482), 2021-08-17

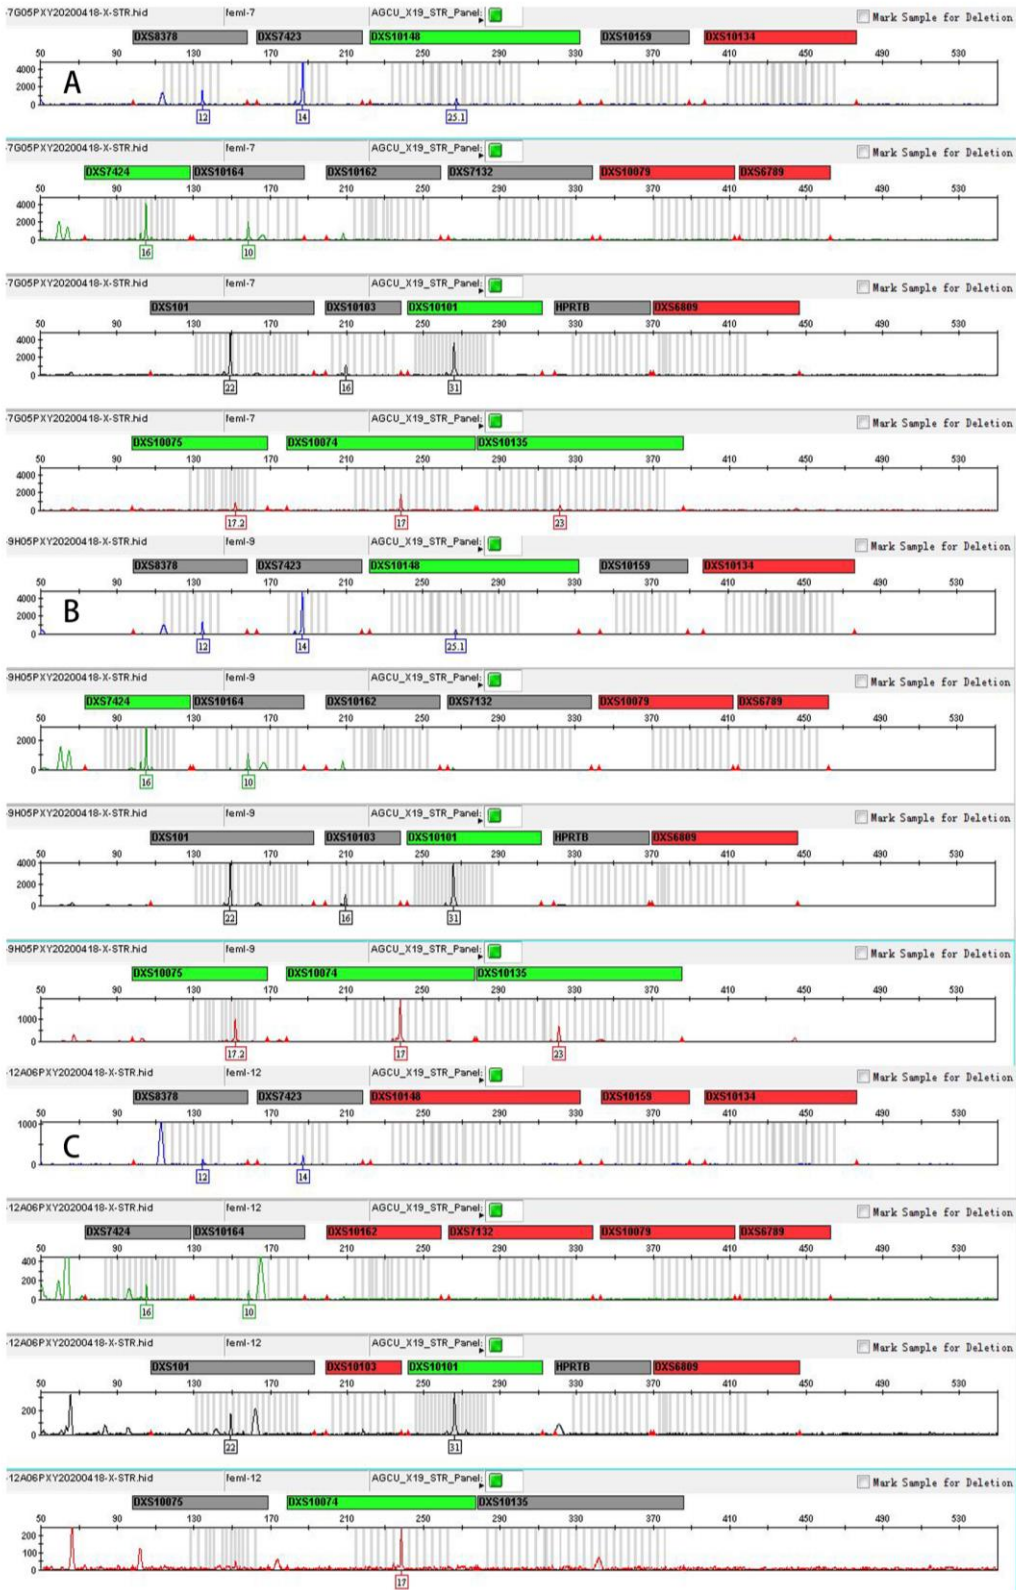

Supplement: Image_3.pdf [file Image_3.pdf]
